# Supplementary material for: Fine Tuning of Hierarchical Zeolite Beta Acid Sites Strength
Source: MDPI journal article supplement (doi:10.3390/cryst14010053), 2023-12-29
Supplement: s1 [file s1]

Supplementary material for:

## Fine Tuning of Hierarchical Zeolite Beta Acid Sites Strength

Ivana Landripet, Andreas Puškarić, Marko Robić and Josip Bronić

Table S1. Number of acid sites calculated from deconvoluted spectra of desorption of CD<sub>3</sub>CN for HB-1 and HB-C series at 100 °C.

| SAMPLE | Total number of acid sites (μmol g <sup>-1</sup> ) | Number of BAS (μmol g <sup>-1</sup> ) | Number of LAS (μmol g <sup>-1</sup> ) |
|--------|----------------------------------------------------|---------------------------------------|---------------------------------------|
| HB-1   | 199                                                | 118                                   | 81                                    |
| MgHB-1 | 583                                                | 181                                   | 401                                   |
| CoHB-1 | 269                                                | 76                                    | 193                                   |
| NiHB-1 | 193                                                | 15                                    | 178                                   |
| CuHB-1 | 65                                                 | 39                                    | 26                                    |
| ZnHB-1 | 161                                                | 32                                    | 129                                   |
| HB-C   | 208                                                | 126                                   | 82                                    |
| MgHB-C | 208                                                | 101                                   | 107                                   |
| CoHB-C | 226                                                | 109                                   | 117                                   |
| NiHB-C | 101                                                | 30                                    | 71                                    |
| CuHB-C | 68                                                 | 42                                    | 24                                    |
| ZnHB-C | 175                                                | 69                                    | 106                                   |

Table S2. Number of acid sites calculated from deconvoluted spectra of desorption of CD<sub>3</sub>CN for HB-1 and HB-C series at 150 °C.

| SAMPLE | Total number of acid sites (μmol g <sup>-1</sup> ) | Number of BAS (μmol g <sup>-1</sup> ) | Number of LAS (μmol g <sup>-1</sup> ) |
|--------|----------------------------------------------------|---------------------------------------|---------------------------------------|
| HB-1   | 123                                                | 42                                    | 81                                    |
| MgHB-1 | 315                                                | 96                                    | 219                                   |
| CoHB-1 | 242                                                | 70                                    | 142                                   |
| NiHB-1 | 118                                                | 8                                     | 110                                   |
| CuHB-1 | 52                                                 | 31                                    | 21                                    |
| ZnHB-1 | 97                                                 | 8                                     | 88                                    |
| HB-C   | 88                                                 | 38                                    | 50                                    |
| MgHB-C | 158                                                | 79                                    | 78                                    |
| CoHB-C | 192                                                | 91                                    | 101                                   |
| NiHB-C | 83                                                 | 26                                    | 57                                    |
| CuHB-C | 55                                                 | 33                                    | 22                                    |
| ZnHB-C | 150                                                | 60                                    | 90                                    |

Table S3. Number of acid sites calculated from deconvoluted spectra of desorption of CD<sub>3</sub>CN for HB-1 and HB-C series at 200 °C.

| SAMPLE | Total number of acid sites (μmol g <sup>-1</sup> ) | Number of BAS (μmol g <sup>-1</sup> ) | Number of LAS (μmol g <sup>-1</sup> ) |
|--------|----------------------------------------------------|---------------------------------------|---------------------------------------|
| HB-1   | 106                                                | 38                                    | 68                                    |
| MgHB-1 | 225                                                | 93                                    | 131                                   |
| CoHB-1 | 146                                                | 34                                    | 112                                   |
| NiHB-1 | 105                                                | 7                                     | 98                                    |
| CuHB-1 | 42                                                 | 21                                    | 21                                    |
| ZnHB-1 | 66                                                 | 7                                     | 59                                    |
| HB-C   | 81                                                 | 32                                    | 49                                    |
| MgHB-C | 99                                                 | 44                                    | 55                                    |
| CoHB-C | 185                                                | 84                                    | 101                                   |
| NiHB-C | 61                                                 | 20                                    | 41                                    |
| CuHB-C | 31                                                 | 19                                    | 12                                    |
| ZnHB-C | 134                                                | 45                                    | 89                                    |

Table S4. Number of acid sites calculated from deconvoluted spectra of desorption of CD<sub>3</sub>CN for HB-1 and HB-C series at 300 °C.

| SAMPLE | Total number of acid sites (μmol g <sup>-1</sup> ) | Number of BAS (μmol g <sup>-1</sup> ) | Number of LAS (μmol g <sup>-1</sup> ) |
|--------|----------------------------------------------------|---------------------------------------|---------------------------------------|
| HB-1   | 44                                                 | 25                                    | 19                                    |
| MgHB-1 | 121                                                | 41                                    | 80                                    |
| CoHB-1 | 95                                                 | 27                                    | 68                                    |
| NiHB-1 | 42                                                 | 2                                     | 40                                    |
| CuHB-1 | 29                                                 | 9                                     | 20                                    |
| ZnHB-1 | 28                                                 | 4                                     | 24                                    |
| HB-C   | 69                                                 | 32                                    | 37                                    |
| MgHB-C | 82                                                 | 36                                    | 46                                    |
| CoHB-C | 125                                                | 57                                    | 68                                    |
| NiHB-C | 20                                                 | 2                                     | 18                                    |
| CuHB-C | 24                                                 | 16                                    | 8                                     |
| ZnHB-C | 114                                                | 38                                    | 76                                    |
